# Supplementary material
Source: Research Square preprint supplement (doi:10.21203/rs.3.rs-9298535/v1)
Supplement: Supplementary file 1 [file 7dae51321e5f5a0ba1af7e8f.docx]

**Table 1. Stability score comparison between LLP and SLP proteins.**

| **Group** | **Mean SSS** | **Cross-validated-mean SSS** |
| --- | --- | --- |
| LLP | 0.881652634863405 | 0.8199233676051194 |
| SLP | −0.9317443608705182 | −0.7749137369997359 |
| **Statistical significance of stability score** | | |
| Mann–Whitney p-value | 3.835 10-35 | 1.346 10-26 |
| Cohen’s d | 1.345 | 1.118 |

**Table 2: Effect of sequence shuffling**

| **Cell Line** | **Original AUC** | **Shuffled AUC** |
| --- | --- | --- |
| Cell 1 | 0.823 | 0.632 |
| Cell 2 | 0.802 | 0.639 |
| Cell 3 | 0.811 | 0.621 |
| Cell 4 | 0.817 | 0.615 |

**Table 3: Stability window analysis**

| **Cell** | **Feature** | **LLP Mean** | **SLP Mean** | **p-value** |
| --- | --- | --- | --- | --- |
| 1 | max_local_score | 2.7777 | 0.6943 | 1.71 10-16 |
| var_local_score | 1.1195 | 1.0701 | 0.426 |
| mean_local_score | 0.758 | -1.1489 | 6.608 10-18 |
| 2 | max_local_score | 2.491 | 0.5311 | 9.351 10-16 |
| var_local_score | 1.2108 | 1.2556 | 0.50708 |
| mean_local_score | 0.5514 | -1.2764 | 2.118 10-17 |
| 3 | max_local_score | 2.819 | 0.6416 | 7.045 10-18 |
| var_local_score | 1.1254 | 1.2881 | 0.783 |
| mean_local_score | 0.7754 | -1.244 | 4.009 10-19 |
| 4 | max_local_score | 2.6625 | 1.1451 | 5.232 10-11 |
| var_local_score | 1.0909 | 1.1901 | 0.995 |
| mean_local_score | 0.7105 | -0.7897 | 4.296 10-19 |

**Table 4: Correlation between stability score and sequence features across cell lines**

| **Cell Line** | **Length (r)** | **Lysine Density (r)** | **Disorder Fraction (r)** |
| --- | --- | --- | --- |
| Cell1 | 0.326 | 0.180 | −0.086 |
| Cell2 | 0.329 | 0.070 | −0.040 |
| Cell3 | 0.268 | 0.319 | 0.012 |
| Cell4 | 0.278 | 0.216 | 0.171 |

**Table 5: Stability-associated sequence organization features across four cell lines**

| **Category** | **Cell** | Feature | LLP Mean | SLP Mean | **p-value** |
| --- | --- | --- | --- | --- | --- |
| **Charge Clustering** | 1 | K_max_cluster | 2.24 | 1.9467 | 4.00 × 10⁻⁵ |
| DE_max_cluster | 3.8567 | 3.30 | 1.88 × 10⁻⁴ |
| K_cluster_count | 47.3467 | 28.33 | 3.14 × 10⁻⁹ |
| charge_blockiness | 0.5514 | 0.5629 | 0.263 |
| 2 | K_max_cluster | 2.18 | 1.9433 | 2.00 × 10⁻⁴ |
| DE_max_cluster | 4.08 | 3.26 | 1.64 × 10⁻⁶ |
| K_cluster_count | 45.1067 | 29.22 | 4.06 × 10⁻⁸ |
| charge_blockiness | 0.5563 | 0.5550 | 0.98 |
| 3 | K_max_cluster | 2.30 | 2.0033 | 2.82 × 10⁻⁶ |
| DE_max_cluster | 3.9367 | 3.29 | 2.20 × 10⁻⁶ |
| K_cluster_count | 46.0167 | 30.21 | 2.02 × 10⁻¹¹ |
| charge_blockiness | 0.5624 | 0.5555 | 0.558 |
| 4 | K_max_cluster | 2.4134 | 2.06 | 1.80 × 10⁻⁶ |
| DE_max_cluster | 3.9867 | 3.34 | 8.07 × 10⁻⁶ |
| K_cluster_count | 44.01 | 33.68 | 1.59 × 10⁻⁶ |
| charge_blockiness | 0.56523 | 0.5592 | 0.722 |
| **Sequence Grammar** | 1 | PEST score | 0.0502 | 0.0559 | 0.066 |
| Proline-rich fraction | 0.0082 | 0.0074 | 0.805 |
| Low complexity fraction | 0.0299 | 0.0355 | 0.065 |
| K spacing | 17.619 | 20.199 | 0.0045 |
| Proline periodicity | 16.075 | 11.227 | 1.34×10⁻⁴ |
| Disorder shift | -0.0137 | -0.0537 | 0.149 |
| 2 | PEST score | 0.0588 | 0.0602 | 0.815 |
| Proline-rich fraction | 0.0066 | 0.0075 | 0.240 |
| Low complexity fraction | 0.0326 | 0.0371 | 0.733 |
| K spacing | 16.168 | 17.270 | 0.272 |
| Proline periodicity | 15.276 | 10.732 | 1.62×10⁻⁵ |
| Disorder shift | 0.0224 | -0.0380 | 0.0297 |
| 3 | PEST score | 0.0569 | 0.0578 | 0.920 |
| Proline-rich fraction | 0.0081 | 0.0078 | 0.375 |
| Low complexity fraction | 0.0344 | 0.0360 | 0.492 |
| K spacing | 15.273 | 18.498 | 3.57×10⁻⁴ |
| Proline periodicity | 15.139 | 11.865 | 0.0187 |
| Disorder shift | -0.0082 | -0.0513 | 0.100 |
| 4 | PEST score | 0.0588 | 0.0548 | 0.144 |
| Proline-rich fraction | 0.0073 | 0.0067 | 0.891 |
| Low complexity fraction | 0.0366 | 0.0343 | 0.548 |
| K spacing | 16.550 | 20.194 | 0.0129 |
| Proline periodicity | 15.708 | 11.938 | 0.0094 |
| Disorder shift | 0.0266 | -0.0134 | 0.181 |

**Table 6: Feature-specific perturbation analysis of sequence grammar components**

| **Perturbation Type** | **Mean Stability Score** | **Δ Stability Score** |
| --- | --- | --- |
| Original | −1.03 | — |
| Lysine disruption | −1.47 | −0.44 |
| Charge disruption | −2.56 | −1.53 |
| Proline disruption | −1.18 | −0.15 |

**Table 7: Stability axis cosine similarity matrix derived using LLP and SLP proteins**

| **Train** | **Cell1** | **Cell2** | **Cell3** | **Cell4** |
| --- | --- | --- | --- | --- |
| Cell1 | 1.000 | 0.908 | 0.804 | 0.869 |
| Cell2 | 0.908 | 1.000 | 0.871 | 0.896 |
| Cell3 | 0.804 | 0.871 | 1.000 | 0.791 |
| Cell4 | 0.869 | 0.896 | 0.791 | 1.000 |

**Table 8: Continuous half-life prediction**

| **Cell** | **Pearson r** | **Spearman r** | **R²** |
| --- | --- | --- | --- |
| Cell 1 | 0.374 | 0.371 | 0.13 |
| Cell 2 | 0.395 | 0.398 | 0.147 |
| Cell 3 | 0.385 | 0.404 | 0.142 |
| Cell 4 | 0.396 | 0.392 | 0.146 |

**Table 9: Performance of the grammar-based logistic regression model.**

| **Cell Line** | **ROC-AUC** | **Precision** |
| --- | --- | --- |
| Cell 1 | 0.678 | 0.629 |
| Cell 2 | 0.656 | 0.635 |
| Cell 3 | 0.666 | 0.617 |
| Cell 4 | 0.676 | 0.639 |
| Human External | 0.654 | 0.61 |
| Mouse | 0.722 | 0.697 |

**Table 10: Perturbation analysis results**

| **Cell** | **Mean Δ Predicted Log-Half-Life** | **Paired t-test p-value** |
| --- | --- | --- |
| 1 | -0.069 | 0.00077 |
| 2 | -0.078 | 1.048 10-6 |
| 3 | -0.024 | 0.0213 |
| 4 | -0.069 | 1.1661 10-5 |

**Table 11: Contribution of different sequence representations**

| **Cell Line** | **Composition (AUC)** | **Grammar (AUC)** | **Motif (AUC)** | **Embedding (AUC)** |
| --- | --- | --- | --- | --- |
| Cell 1 | 0.642 | 0.678 | 0.712 | 0.823 |
| Cell 2 | 0.667 | 0.656 | 0.721 | 0.802 |
| Cell 3 | 0.699 | 0.666 | 0.711 | 0.811 |
| Cell 4 | 0.696 | 0.676 | 0.726 | 0.817 |
